# Supplementary material for: Analysis of Selected Nutritional Parameters in Patients with HPV-Related and Non-HPV-Related Oropharyngeal Cancer before and after Radiotherapy Alone or Combined with Chemotherapy
Source: MDPI journal article supplement (doi:10.3390/cancers14092335), 2022-05-09
Supplement: s1 [file s1]

# Analysis of Selected Nutritional Parameters in Patients with HPV-Related and HPV- not Related Oropharyngeal Cancer Before and After Radiotherapy Alone or Combined with Chemotherapy

Adam Brewczyński<sup>1</sup>, Beata Jabłońska<sup>2\*</sup>, Agnieszka Maria Mazurek<sup>3</sup>, Jolanta Mrochem-Kwarciak<sup>4</sup>, Sławomir Mrowiec<sup>2</sup>, Mirosław Śnietura<sup>5</sup>, Marek Kentnowski<sup>1</sup>, Anna Kotylak<sup>1</sup>, Zofia Kolosza<sup>6</sup>, Krzysztof Składowski<sup>1</sup> and Tomasz Rutkowski<sup>1</sup>

## Supplementary materials:

**Table S1.** Laboratory results in patients before and after treatment.

**Table S2.** Weight, BMI and laboratory results: differences before and after treatment in HPV- and HPV+ groups undergoing RT and CRT separately (comparison of values before and after RT/CRT within individual HPV- and HPV+ subgroups + separately).

**Table S3.** Weight, BMI and laboratory results before and after treatment in HPV- and HPV+ groups undergoing RT and CRT separately (comparison of difference values between two subgroups according to HPV status).

**Table S4.** Comparison of selected clinicopathological factors between groups with low and high prognostic nutritional index (PNI).

**Table S5.** Overall survival (OS) in patients: univariate and multivariate analysis for pre-treatment parameters.

**Table S6.** Disease-free survival (DFS) in patients: univariate and multivariate analysis for pre-treatment parameters.

**Figure S1.** Overall and disease-free survival in HPV- and HPV+ patients depending on NRS 2002 (NRS 2002<3 vs. NRS 2002≥3).

**Figure S2.** Overall and disease-free survival in HPV- and HPV+ patients depending on NRS 2002 (weight loss<5% vs. weight loss>5%).

**Table S1.** Laboratory results in patients before and after treatment.

|                      | All                       | HPV(-)                    | HPV(+)                   | p     | p HB  |
|----------------------|---------------------------|---------------------------|--------------------------|-------|-------|
| CRP 0 [g/l]          | 5.15±7.07 (0.16-36.90)    | 6.79±8.39 (0.16-36.90)    | 3.40±4.80 (0.17-27.20)   | 0.008 | 0.088 |
| CRP 1 [g/l]          | 26.60±35.93 (0.17-197.00) | 30.96±44.43 (0.20-197.00) | 22.00±23.50 (0.17-87.20) | 0.179 | 1.000 |
| Albumin 0 [g/l]      | 41.67±3.68 (33.00-50.00)  | 41.58±3.65 (33.00-49.00)  | 41.77±3.74 (32.00-50.00) | 0.778 | 1.000 |
| Albumin 1 [g/l]      | 36.95±3.92 (30.00-49.00)  | 37.05±4.11 (30.00-47.00)  | 36.84±3.75 (30.00-49.00) | 0.778 | 1.000 |
| Prealbumin 0 [g/l]   | 0.28±0.08 (0.13-0.52)     | 0.26±0.09 (0.13-0.52)     | 0.29±0.07 (0.18-0.45)    | 0.092 | 0.920 |
| Prealbumin 1 [g/l]   | 0.20±0.08 (0.08-0.49)     | 0.19±0.07 (0.08-0.35)     | 0.21±0.09 (0.09-0.49)    | 0.223 | 1.000 |
| Haemoglobin 0 [g/dl] | 13.97± 1.50 (10.60-17.40) | 14.05±1.51 (12.85-15.35)  | 13.88±1.51 (10.80-16.90) | 0.530 | 1.000 |
| Haemoglobin 1 [g/dl] | 12.70± 1.50 (9.40-16.30)  | 12.29±1.46 (9.40-16.30)   | 12.03±1.54 (9.50-15.80)  | 0.331 | 1.000 |

|                           |                          |                          |                          |       |       |
|---------------------------|--------------------------|--------------------------|--------------------------|-------|-------|
| TLC 0 [/mm <sup>3</sup> ] | 1.90±0.72 (0.57-4.84)    | 1.91±0.71 (0.65-3.94)    | 1.89±0.73 (0.57-4.54)    | 0.842 | 0.842 |
| TLC 1 [/mm <sup>3</sup> ] | 0.62±0.37 (0.11-2.84)    | 0.71±0.44 (0.11-2.84)    | 0.52±0.24 (0.17-1.34)    | 0.004 | 0.048 |
| PNI 0                     | 41.68±3.68 (32.00-50.00) | 41.59±3.65 (33.01-49.01) | 41.78±3.74 (32.00-50.00) | 0.778 | 1.000 |
| PNI 1                     | 36.95±3.92 (30.00-49.00) | 37.05±4.11 (30.00-47.00) | 36.85±3.75 (30.00-49.00) | 0.777 | 1.000 |

Values are presented as means and standard deviations.

0, before treatment, 1 after treatment; CRP, C-reactive protein; TLC, total lymphocyte count; PNI, prognostic nutritional index.

H-B Holm-Bonferroni correction for multiple testing

**Table S2.** Weight, BMI and laboratory results: differences before and after treatment in HPV- and HPV+ groups undergoing RT and CRT separately (comparison of values before and after RT/CRT within individual HPV- and HPV+ subgroups + separately).

|                              | CRT          |              | <i>p</i> | <i>p</i> H-B | RT           |              | <i>p</i> | <i>p</i> H-B |
|------------------------------|--------------|--------------|----------|--------------|--------------|--------------|----------|--------------|
|                              | HPV(-)       | HPV(+)       |          |              | HPV(-)       | HPV(+)       |          |              |
| Weight 0-1 [kg]              | 4.11±3.75    | 5.76±4.27    | 0.142    | 1.000        | 4.89±3.68    | 4.83±4.21    | 1.000    | 1.000        |
| Weight [%]                   | 5.62±5.24    | 7.32±5.24    | 0.221    | 1.000        | 5.73±3.74    | 5.13±4.55    | 1.000    | 1.000        |
| BMI 0-1 [kg/m <sup>2</sup> ] | 1.44±1.34    | 1.99±1.40    | 0.127    | 1.000        | 1.84±1.37    | 1.81±1.70    | 1.000    | 1.000        |
| CRP 0-1 [g/l]                | -19.70±37.60 | -17.92±22.07 | 0.623    | 1.000        | -32.39±55.67 | -24.79±32.97 | 0.803    | 1.000        |
| Albumin 0-1 [g/l]            | 4.89±4.37    | 5.00±5.05    | 0.774    | 1.000        | 3.75±4.33    | 5.14±4.53    | 0.221    | 1.000        |
| Prealbumin 0-1 [g/l]         | 0.059±0.101  | 0.088±0.098  | 0.237    | 1.000        | 0.079±0.087  | 0.002±0.116  | 0.431    | 1.000        |
| Haemoglobin 0-1 [g/dl]       | 2.10±1.54    | 2.04±1.55    | 0.943    | 1.000        | 1.10±1.05    | 0.44±1.13    | 0.249    | 1.000        |
| TLC 0-1 [/mm <sup>3</sup> ]  | 1.22±0.77    | 1.36±0.70    | 0.438    | 1.000        | 1.15±0.63    | 1.46±0.69    | 0.351    | 1.000        |
| PNI 0-1                      | 4.90±1.37    | 5.01±5.06    | 0.739    | 1.000        | 3.76±4.33    | 5.15±4.53    | 0.213    | 1.000        |

**Table S3.** Weight, BMI and laboratory results before and after treatment in HPV- and HPV+ groups undergoing RT and CRT separately (comparison of difference values between two subgroups according to HPV status).

|  | CRT    |        | <i>p</i> | <i>p</i> H-B | RT     |        | <i>p</i> | <i>p</i> H-B |
|--|--------|--------|----------|--------------|--------|--------|----------|--------------|
|  | HPV(-) | HPV(+) |          |              | HPV(-) | HPV(+) |          |              |

|                            |             |             |       |       |             |             |       |       |
|----------------------------|-------------|-------------|-------|-------|-------------|-------------|-------|-------|
| Weight 0 [kg]              | 72.60±14.13 | 78.58±14.92 | 0.091 | 1.000 | 71.99±17.04 | 85.53±11.43 | 0.050 | 1.000 |
| Weight 1[kg]               | 68.96±13.24 | 72.10±14.71 | 0.560 | 1.000 | 75.08±13.44 | 86.73±9.72  | 0.276 | 1.000 |
| BMI 0 [kg/m <sup>2</sup> ] | 25.11±4.00  | 27.78±4.31  | 0.007 | 0.241 | 26.92±5.69  | 30.52±3.58  | 0.103 | 1.000 |
| BMI 1 [kg/m <sup>2</sup> ] | 23.56±3.21  | 25.40±4.10  | 0.090 | 1.000 | 27.91±4.53  | 30.91±3.47  | 0.350 | 1.000 |
| NRS 2002 0                 | 0.36±0.84   | 0.20±0.40   | 0.883 | 1.000 | 0.50±0.93   | 0.86±1.46   | 0.615 | 1.000 |
| NRS 2002 1                 | 3.06±1.15   | 3.40±1.12   | 0.217 | 1.000 | 2.73±0.90   | 3.33±0.58   | 0.314 | 1.000 |
| CRP 0 [g/l]                | 7.18±9.76   | 2.94±3.77   | 0.016 | 0.546 | 6.02±4.84   | 6.81±9.24   | 0.730 | 1.000 |
| CRP 1 [g/l]                | 27.13±35.78 | 20.66±22.49 | 0.770 | 1.000 | 38.63±58.38 | 31.59±30.05 | 0.978 | 1.000 |
| Albumin 0 [g/l]            | 42.05±3.91  | 41.92±3.93  | 0.949 | 1.000 | 40.67±2.96  | 40.71±1.80  | 0.957 | 1.000 |
| Albumin 1 [g/l]            | 37.23±4.16  | 37.02±3.77  | 0.899 | 1.000 | 36.71±4.10  | 35.57±3.60  | 0.454 | 1.000 |
| Prealbumin 0 [g/l]         | 0.277±0.079 | 0.301±0.070 | 0.117 | 1.000 | 0.230±0.098 | 0.213±0.029 | 0.861 | 1.000 |
| Prealbumin 1 [g/l]         | 0.213±0.072 | 0.217±0.081 | 0.965 | 1.000 | 0.150±0.048 | 0.200±0.120 | 0.536 | 1.000 |
| Haemoglobin 0 [g/dl]       | 14.08±1.50  | 13.85±1.56  | 0.466 | 1.000 | 14.00±1.54  | 14.09±1.10  | 0.887 | 1.000 |
| Haemoglobin 1 [g/dl]       | 11.98±1.40  | 11.82±1.41  | 0.450 | 1.000 | 12.87±1.41  | 13.64±1.65  | 0.249 | 1.000 |
| TLC 0 [/mm <sup>3</sup> ]  | 1.91±0.78   | 1.89±0.75   | 0.840 | 1.000 | 1.91±0.56   | 1.85±0.57   | 0.723 | 1.000 |
| TLC 1 [/mm <sup>3</sup> ]  | 0.69±0.47   | 0.53±0.25   | 0.084 | 1.000 | 0.74±0.38   | 0.40±0.16   | 0.006 | 0.234 |
| PNI 0                      | 42.06±3.91  | 41.93±3.93  | 0.936 | 1.000 | 40.68±2.96  | 40.72±1.80  | 1.000 | 1.000 |
| PNI 1                      | 37.23±4.16  | 37.02±3.77  | 0.820 | 1.000 | 36.72±4.10  | 35.57±3.60  | 0.265 | 1.000 |

**Table S4.** Comparison of selected clinicopathological factors between groups with low and high prognostic nutritional index (PNI).

|             | All        |            |       |       | HPV(-)     |            |       |      | HPV(+)     |            |       |       |
|-------------|------------|------------|-------|-------|------------|------------|-------|------|------------|------------|-------|-------|
|             | PNI<41.68  | PNI≥41.68  | p     | p HB  | PNI<41.59  | PNI≥41.59  | p     | p HB | PNI<41.78  | PNI≥41.78  | p     | p HB  |
| Age [years] | 62.8       | 58.5       | 0.004 | 0.076 | 62.5       | 59.2       | 0.031 | 1.00 | 57.7       | 63.2       | 0.004 | 0.148 |
| Gender      |            |            | 0.235 | 1.00  |            |            | 0.764 | 1.00 |            |            | 0.184 | 1.00  |
| M           | 38 (64.4%) | 45 (75.0%) |       |       | 24 (75.0%) | 24 (80.0%) |       |      | 14 (51.9%) | 21 (70.0%) |       |       |
| F           | 21 (35.6%) | 15 (25.0%) |       |       | 8 (25.0%)  | 6 (20.0%)  |       |      | 13 (48.1%) | 9 (30.0%)  |       |       |

|                           |            |            |       |       |            |            |       |      |            |            |       |      |
|---------------------------|------------|------------|-------|-------|------------|------------|-------|------|------------|------------|-------|------|
| General location          |            |            | 0.004 | 0.072 |            |            | 0.033 | 1.00 |            |            | 0.093 | 1.00 |
| Tonsil                    | 36 (61.0%) | 51 (85.0%) |       |       | 17 (53.1%) | 24 (80.0%) |       |      | 19 (70.4%) | 27 (90.0%) |       |      |
| Others                    | 23 (39.0%) | 9 (15.0%)  |       |       | 15 (46.9%) | 6 (20.0%)  |       |      | 8 (29.6%)  | 3 (10.0%)  |       |      |
| Detailed location         |            |            | 0.005 | 0.085 |            |            | 0.031 | 1.00 |            |            | 0.120 | 1.00 |
| 1. tonsil                 | 36 (61.0%) | 51 (85.0%) |       |       | 17 (53.1%) | 24 (80.0%) |       |      | 19 (70.4%) | 27 (90.0%) |       |      |
| 2. palate                 | 8 (13.6%)  | 1 (1.7%)   |       |       | 8 (25.0%)  | 1 (3.3%)   |       |      |            |            |       |      |
| 3. root of the tongue     | 12 (20.3%) | 8 (13.3%)  |       |       | 7 (21.9%)  | 5 (16.7%)  |       |      | 5 (18.5%)  | 3 (10.0%)  |       |      |
| 4. other oropharynx       | 3 (5.1%)   | 0 (0%)     |       |       | 0          | 0          |       |      | 3 (11.1%)  | 0          |       |      |
| Histological grading      |            |            | 0.346 | 1.00  |            |            | 0.515 | 1.00 |            |            | 0.367 | 1.00 |
| G1                        | 3 (8.1%)   | 4 (10.8%)  |       |       | 3 (15.0%)  | 3 (14.3%)  |       |      | 0          | 1 (6.3%)   |       |      |
| G2                        | 27 (73.0%) | 21 (56.8%) |       |       | 15 (75.0%) | 13 (61.9%) |       |      | 12 (70.6%) | 8 (50.0%)  |       |      |
| G3                        | 7 (18.9%)  | 12 (32.4%) |       |       | 2 (10.0%)  | 5 (23.8%)  |       |      | 5 (29.4%)  | 7 (43.8%)  |       |      |
|                           |            |            | 0.287 | 1.00  |            |            | 0.410 | 1.00 |            |            | 0.481 | 1.00 |
| G1-2                      | 30 (81.1%) | 25 (67.6%) |       |       | 18 (90.0%) | 16 (76.2%) |       |      | 12 (70.6%) | 9 (56.3%)  |       |      |
| G3                        | 7 (18.9%)  | 12 (32.4%) |       |       | 2 (10.0%)  | 5 (23.8%)  |       |      | 5 (29.4%)  | 7 (43.8%)  |       |      |
| Tumor depth (T)           |            |            | 0.257 | 1.00  |            |            | 0.107 | 1.00 |            |            | 0.733 | 1.00 |
| T1                        | 5 (8.5%)   | 6 (10.0%)  |       |       | 3 (9.4%)   | 3 (10.0%)  |       |      | 2 (7.4%)   | 3 (10.0%)  |       |      |
| T2                        | 19 (32.2%) | 21 (35.0%) |       |       | 13 (40.6%) | 11 (36.7%) |       |      | 6 (22.2%)  | 10 (33.3%) |       |      |
| T3                        | 18 (30.5%) | 25 (41.7%) |       |       | 7 (21.9%)  | 14 (46.7%) |       |      | 11 (40.7%) | 11 (36.7%) |       |      |
| T4                        | 16 (27.1%) | 8 (13.3%)  |       |       | 8 (25.0%)  | 2 (6.7%)   |       |      | 8 (29.6%)  | 6 (20.0%)  |       |      |
| Tx                        | 1 (1.7%)   | 0          |       |       | 1 (3.1%)   | 0          |       |      |            |            |       |      |
|                           |            |            | 0.714 | 1.00  |            |            | 0.805 | 1.00 |            |            | 0.410 | 1.00 |
| T1-2                      | 24 (40.7%) | 27 (45.0%) |       |       | 16 (50.0%) | 14 (46.7%) |       |      | 8 (29.6%)  | 13 (43.3%) |       |      |
| T3-4                      | 34 (59.3%) | 33 (55.0%) |       |       | 16 (50.0%) | 16 (53.3%) |       |      | 19 (70.4%) | 17 (56.7%) |       |      |
| Lymph node metastasis (N) |            |            | 0.366 | 1.00  |            |            | 0.771 | 1.00 |            |            | 0.476 | 1.00 |
| N0                        | 13 (22.0%) | 10 (16.7%) |       |       | 10 (31.3%) | 7 (23.3%)  |       |      | 3 (11.1%)  | 3 (10.0%)  |       |      |
| N1                        | 8 (13.6%)  | 16 (26.7%) |       |       | 6 (18.8%)  | 9 (30.0%)  |       |      | 2 (7.4%)   | 7 (23.3%)  |       |      |
| N2                        | 29 (49.2%) | 26 (43.3%) |       |       | 12 (37.5%) | 10 (33.3%) |       |      | 17 (63.0%) | 16 (53.3%) |       |      |
| N3                        | 8 (13.6%)  | 8 (13.3%)  |       |       | 4 (12.5%)  | 4 (13.3%)  |       |      | 4 (14.8%)  | 4 (13.3%)  |       |      |
| Nx                        | 1 (1.7%)   | 0          |       |       |            |            |       |      | 1 (3.7%)   | 0          |       |      |
|                           |            |            | 0.455 | 1.00  |            |            | 0.805 | 1.00 |            |            | 0.241 | 1.00 |
| N0-1                      | 21 (35.6%) | 26 (43.3%) |       |       | 16 (50.0%) | 16 (53.3%) |       |      | 5 (18.5%)  | 10 (33.3%) |       |      |
| N2-3                      | 38 (64.4%) | 34 (56.7%) |       |       | 16 (50.0%) | 14 (46.7%) |       |      | 22 (81.5%) | 20 (66.7%) |       |      |
| Treatment duration [days] |            |            | 0.233 | 1.00  | 43.3       | 44.9       | 0.292 | 1.00 | 47.7       | 49.4       | 0.233 | 1.00 |

|                                    |            |            |  |       |      |            |            |       |      |            |            |       |       |
|------------------------------------|------------|------------|--|-------|------|------------|------------|-------|------|------------|------------|-------|-------|
| General treatment regimen          |            |            |  | 0.394 | 1.00 |            |            | 0.598 | 1.00 |            |            | 0.697 | 1.00  |
| RT                                 | 16 (27.1%) | 12 (20.0%) |  |       |      | 12 (37.5%) | 9 (30.0%)  |       |      | 4 (14.8%)  | 3 (10.0%)  |       |       |
| CRT                                | 43 (72.9%) | 48 (80.0%) |  |       |      | 20         | 21         |       |      | 23 (85.2%) | 27 (90.0%) |       |       |
| Weight loss                        |            |            |  | 0.282 | 1.00 |            |            | 0.751 | 1.00 |            |            | 0.260 | 1.00  |
| 1. Stable                          |            |            |  |       |      |            |            |       |      |            |            |       |       |
| 2. Weight loss ≤ 5%                | 21 (50.0%) | 17 (37.0%) |  |       |      | 10 (50.0%) | 8 (42.1%)  |       |      | 11 (50.0%) | 9 (33.3%)  |       |       |
| 3. Weight loss > 5%                | 21 (50.0%) | 29 (63.0%) |  |       |      | 10 (50.0%) | 11 (57.9%) |       |      | 11 (50.0%) | 18 (66.7%) |       |       |
| Initial BMI [kg/m <sup>2</sup> ]   |            |            |  | 27.0  | 26.8 | 0.922      | 1.00       | 25.5  | 26.0 | 0.816      | 1.00       | 27.6  | 28.8  |
| BMI groups                         |            |            |  |       |      | 0.679      | 1.00       |       |      | 1.00       | 1.00       |       | 0.474 |
| 1. <18.5                           | 3 (5.1%)   | 2 (3.3%)   |  |       |      | 2 (6.3%)   | 2 (6.7%)   |       |      | 1 (3.7%)   | 0          |       |       |
| 2. ≥18.5                           | 56 (94.9%) | 58 (96.7%) |  |       |      | 30 (93.8%) | 28 (93.3%) |       |      | 26 (96.3%) | 30 (100%)  |       |       |
| NRS 2002 (mean value)              |            |            |  |       |      |            |            |       |      |            |            |       |       |
| NRS 2002                           |            |            |  | 0.547 | 1.00 |            |            | 0.701 | 1.00 |            |            | 0.145 | 1.00  |
| 0                                  | 43 (72.9%) | 47 (79.7%) |  |       |      | 25 (78.1%) | 22 (73.3%) |       |      | 18 (66.7%) | 25 (86.2%) |       |       |
| 1.                                 | 13 (22.0%) | 7 (11.9%)  |  |       |      | 5 (15.6%)  | 3 (10.0%)  |       |      | 8 (29.6%)  | 4 (13.8%)  |       |       |
| 2.                                 | 1 (1.7%)   | 3 (5.1%)   |  |       |      | 1 (3.1%)   | 3 (10.0%)  |       |      |            |            |       |       |
| 3.                                 | 1 (1.7%)   | 1 (1.7%)   |  |       |      | 1 (3.1%)   | 1 (3.3%)   |       |      |            |            |       |       |
| 4.                                 | 1 (1.7%)   | 1 (1.7%)   |  |       |      | 0          | 1 (3.3%)   |       |      | 1 (3.7%)   | 0          |       |       |
| 5.                                 |            |            |  |       |      |            |            |       |      |            |            |       |       |
| NRS 2002<br>(division into groups) |            |            |  |       | 1.00 |            |            | 0.607 |      |            |            | 0.482 |       |
| 1. <3                              | 57 (96.6%) | 57 (96.6%) |  |       | 1.00 | 31 (96.9%) | 28 (93.3%) |       | 1.00 | 26 (96.3%) | 29 (100%)  |       | 1.00  |
| 2. ≥3                              | 2 (3.4%)   | 2 (3.3%)   |  |       |      | 1 (3.1%)   | 2 (6.7%)   |       |      | 1 (3.7%)   | 0          |       |       |
| Smoking                            |            |            |  | 1.00  | 1.00 |            |            | 0.589 | 1.00 |            |            | 0.410 | 1.00  |
| Yes                                | 30 (50.8%) | 30 (50.0%) |  |       |      | 23 (71.9%) | 19 (63.3%) |       |      | 7 (25.9%)  | 11 (36.7%) |       |       |
| No                                 | 29 (49.2%) | 30 (50.0%) |  |       |      | 9 (28.1%)  | 11 (36.7%) |       |      | 20 (74.1%) | 19 (63.3%) |       |       |
| Alcohol abuse                      |            |            |  | 1.00  | 1.00 |            |            | 0.607 | 1.00 |            |            |       |       |
| Yes                                | 1 (1.7%)   | 2 (3.3%)   |  |       |      | 1 (3.1%)   | 2 (6.7%)   |       |      | 0          | 0          |       |       |
| No                                 | 58 (98.3%) | 58 (96.7%) |  |       |      | 31 (96.9%) | 28 (93.3%) |       |      | 27 (100%)  | 30 (100%)  |       |       |

RT, radiotherapy; CRT, chemoradiotherapy, BMI, body mass index; NRS 2002, Nutritional Risk Score.

**Table S5.** Overall survival (OS) in patients: univariate and multivariate analysis for pre-treatment parameters.

| Variable                                     | Univariate analysis |                     |              | Multivariate analysis |              |
|----------------------------------------------|---------------------|---------------------|--------------|-----------------------|--------------|
|                                              | n                   | HR<br>(95%CI)       | p-value      | HR<br>(95%CI)         | p-value      |
| CRP<br>>3.50 vs. ≤3.50                       | 120                 | 2.50<br>(1.28-4.88) | <b>0.007</b> | 2.22<br>1.12-4.42     | <b>0.023</b> |
| Albumin [g/l]<br>>40.0 vs. ≤40.0             | 119                 | 1.41<br>(0.70-2.83) | 0.337        |                       |              |
| Hb 0 [g/dl]<br>>13.5 vs. ≤13.5               | 127                 | 0.82<br>(0.43-1.55) | 0.544        |                       |              |
| TLC 0 [/mm <sup>3</sup> ]<br>>1.28 vs. ≤1.28 | 127                 | 0.62<br>(0.30-1.28) | 0.196        |                       |              |
| PNI >39.01 vs. ≤39.01                        | 119                 | 1.08<br>(0.50-2.30) | 0.845        |                       |              |
| Age >60 vs. ≤60                              | 127                 | 0.86<br>(0.46-1.63) | 0.653        |                       |              |
| Gender F vs. M                               | 127                 | 0.49<br>(0.22-1.07) | <b>0.073</b> | 0.32<br>0.13-0.82     | <b>0.017</b> |
| General location<br>tonsil vs. others        | 127                 | 1.60<br>(0.73-3.49) | 0.239        | 3.20<br>1.19-8.60     | <b>0.021</b> |
| Tumor depth (T)<br>T3-4 vs. T1-2             | 126                 | 1.02<br>(0.53-1.94) | 0.962        |                       |              |
| Lymph node metastasis<br>N 2-3 vs. N 0-1     | 126                 | 1.09<br>(0.57-2.09) | 0.791        |                       |              |
| Radiotherapy vs.<br>Radiochemotherapy        | 127                 | 1.28<br>(0.63-2.58) | 0.493        |                       |              |

|                             |     |                      |              |                    |              |
|-----------------------------|-----|----------------------|--------------|--------------------|--------------|
| BMI 0<br>>24.53 vs. <24.53  | 127 | 0.37<br>(0.19-0.70)  | <b>0.003</b> | 0.32<br>0.14-0.72  | <b>0.006</b> |
| NRS 2002<br>>1 vs. ≤1       | 126 | 3.99<br>(1.66-9.62)  | <b>0.002</b> |                    |              |
| Smoking<br>Yes vs. No       | 127 | 1.40<br>(0.74-2.67)  | 0.306        | 0.48<br>0.22-1.07  | <b>0.074</b> |
| Alcohol abuse<br>Yes vs. No | 127 | 6.38<br>(1.89-21.51) | <b>0.003</b> | 3.86<br>1.00-14.86 | <b>0.050</b> |
| HPV+ vs. HPV-               | 127 | 0.31<br>(0.16-0.63)  | <b>0.001</b> | 0.36<br>0.16-0.80  | <b>0.012</b> |

0, before treatment; Hb, haemoglobin level; TLC, lymphocyte count .

**Table S6.** Disease-free survival (DFS) in patients: univariate and multivariate analysis for pre-treatment parameters.

| Variable                                     | Univariate analysis |                     |               | Multivariate analysis |              |
|----------------------------------------------|---------------------|---------------------|---------------|-----------------------|--------------|
|                                              | n                   | HR<br>(95%CI)       | p-value       | HR<br>(95%CI)         | p-value      |
| CRP<br>>3.50 vs. 3.50                        | 120                 | 4.00<br>1.87-8.56   | <b>0.0004</b> | 3.53<br>1.50-8.32     | <b>0.004</b> |
| Albumin [g/l]<br>>40.0 vs. <40.0             | 119                 | 0.86<br>0.42-1.77   | 0.677         |                       |              |
| Hb 0 [g/dl]<br>>13.5 vs. <13.5               | 127                 | 0.50<br>(0.25-1.00) | <b>0.051</b>  |                       |              |
| TLC 0 [/mm <sup>3</sup> ]<br>>1.28 vs. <1.28 | 127                 | 0.44<br>(0.21-0.92) | <b>0.028</b>  |                       |              |
| PNI >39.01 vs. <39.01                        | 119                 | 0.48<br>0.23-0.99   | <b>0.046</b>  | 0.47<br>0.21-1.06     | <b>0.070</b> |
| Age >60 vs. ≤60                              | 127                 | 0.83<br>0.42-1.65   | 0.604         |                       |              |

|                                          |     |                     |               |                     |              |
|------------------------------------------|-----|---------------------|---------------|---------------------|--------------|
| Gender F vs. M                           | 127 | 0.86<br>0.41-1.81   | 0.693         |                     |              |
| General location<br>tonsil vs. others    | 127 | 1.33<br>0.60-2.94   | 0.489         | 2.74<br>0.97-7.70   | <b>0.056</b> |
| Tumor depth (T)<br>T3-4 vs. T1-2         | 126 | 1.22<br>0.61-2.45   | 0.578         |                     |              |
| Lymph node metastasis<br>N 2-3 vs. N 0-1 | 126 | 2.11<br>(0.98-4.54) | <b>0.057</b>  | 3.28<br>(1.33-8.12) | <b>0.010</b> |
| Radiotherapy vs.<br>Radiochemotherapy    | 127 | 0.93<br>(0.42-2.06) | 0.854         |                     |              |
| BMI 0<br>>24.53 vs. <24.53               | 127 | 0.32<br>0.16-0.64   | <b>0.001</b>  |                     |              |
| NRS 2002<br>>1 vs. ≤1                    | 126 | 5.05<br>2.07-12.34  | <b>0.0004</b> | 5.92<br>1.84-19.05  | <b>0.003</b> |
| Smoking<br>Yes vs. No                    | 127 | 1.39<br>0.70-2.78   | 0.346         |                     |              |
| Alcohol abuse<br>Yes vs. No              | 127 | 4.35<br>1.03-18.35  | <b>0.046</b>  | 5.78<br>1.04-31.97  | <b>0.045</b> |
| HPV+ vs. HPV-                            | 127 | 0.28<br>(0.12-0.62) | <b>0.002</b>  | 0.33<br>0.14-0.81   | <b>0.015</b> |

0, before treatment; Hb, haemoglobin level; TLC, lymphocyte count .



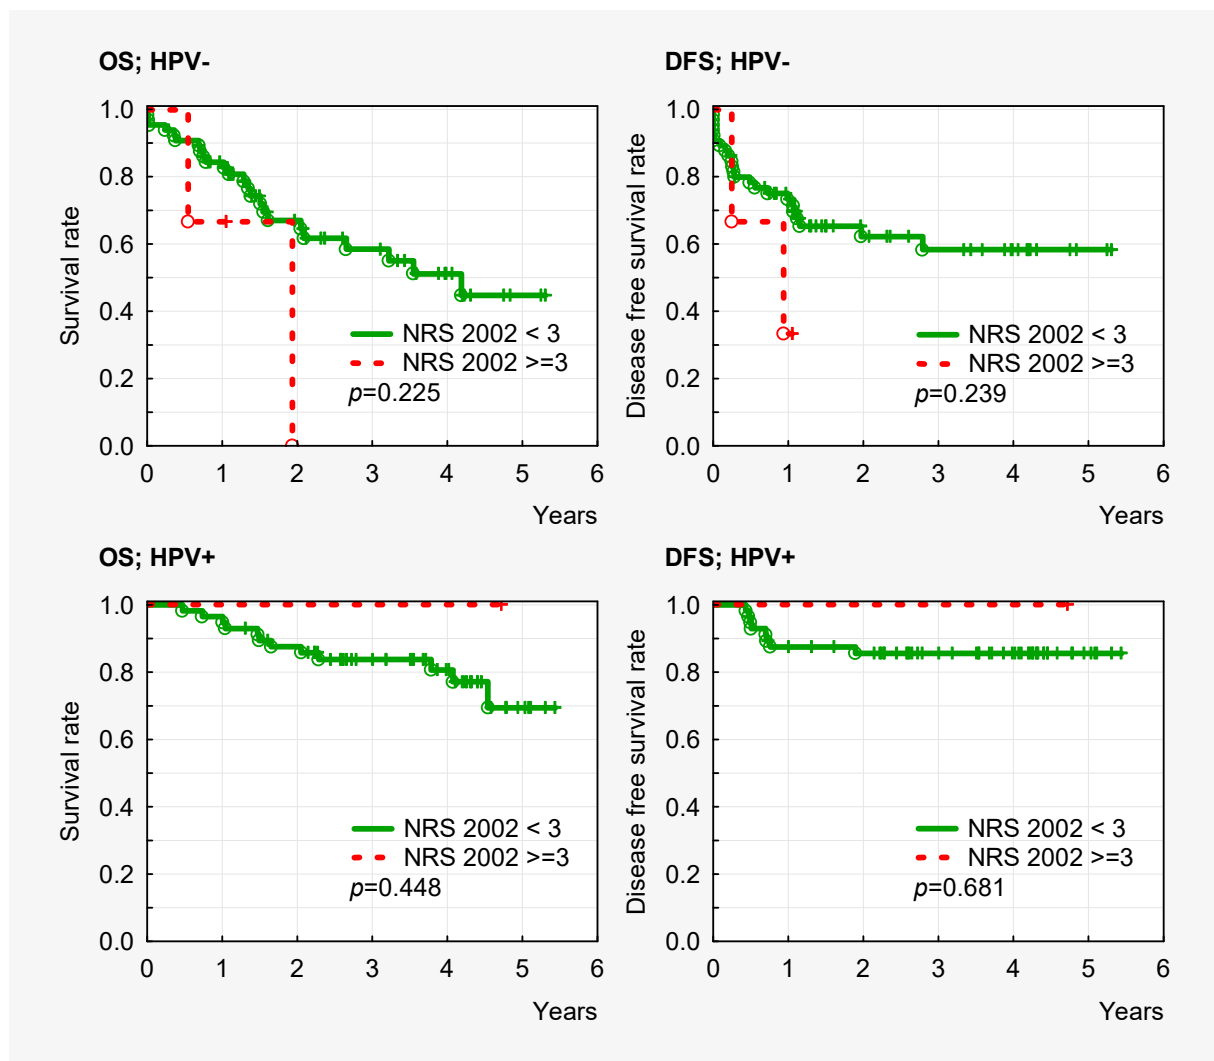

**Figure S1.** Overall and disease-free survival in HPV- and HPV+ patients depending on NRS 2002 (NRS 2002<3 vs. NRS 2002≥3).

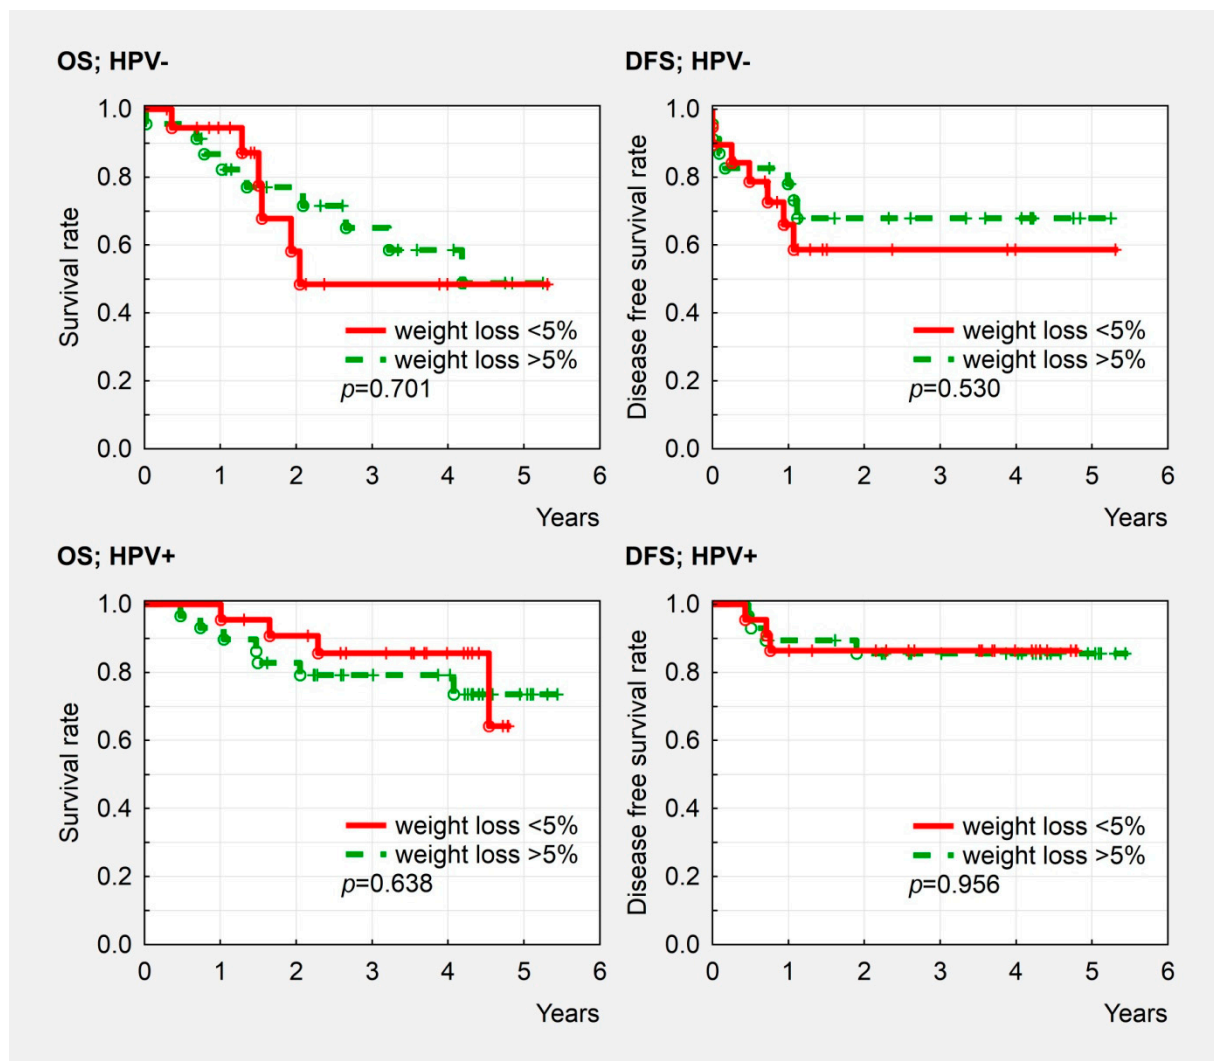

**Figure S2.** Overall and disease-free survival in HPV- and HPV+ patients depending on NRS 2002 (weight loss<5% vs. weight loss>5%).
